# Supplementary material for: Rapid host adaptation by extensive recombination
Source: PubMed Central journal article supplement (PMC2885065; doi:10.1099/vir.0.007724-0), 2009-03
Supplement: supp_90_3_734__1.pdf [file supp_90_3_734__1.pdf]

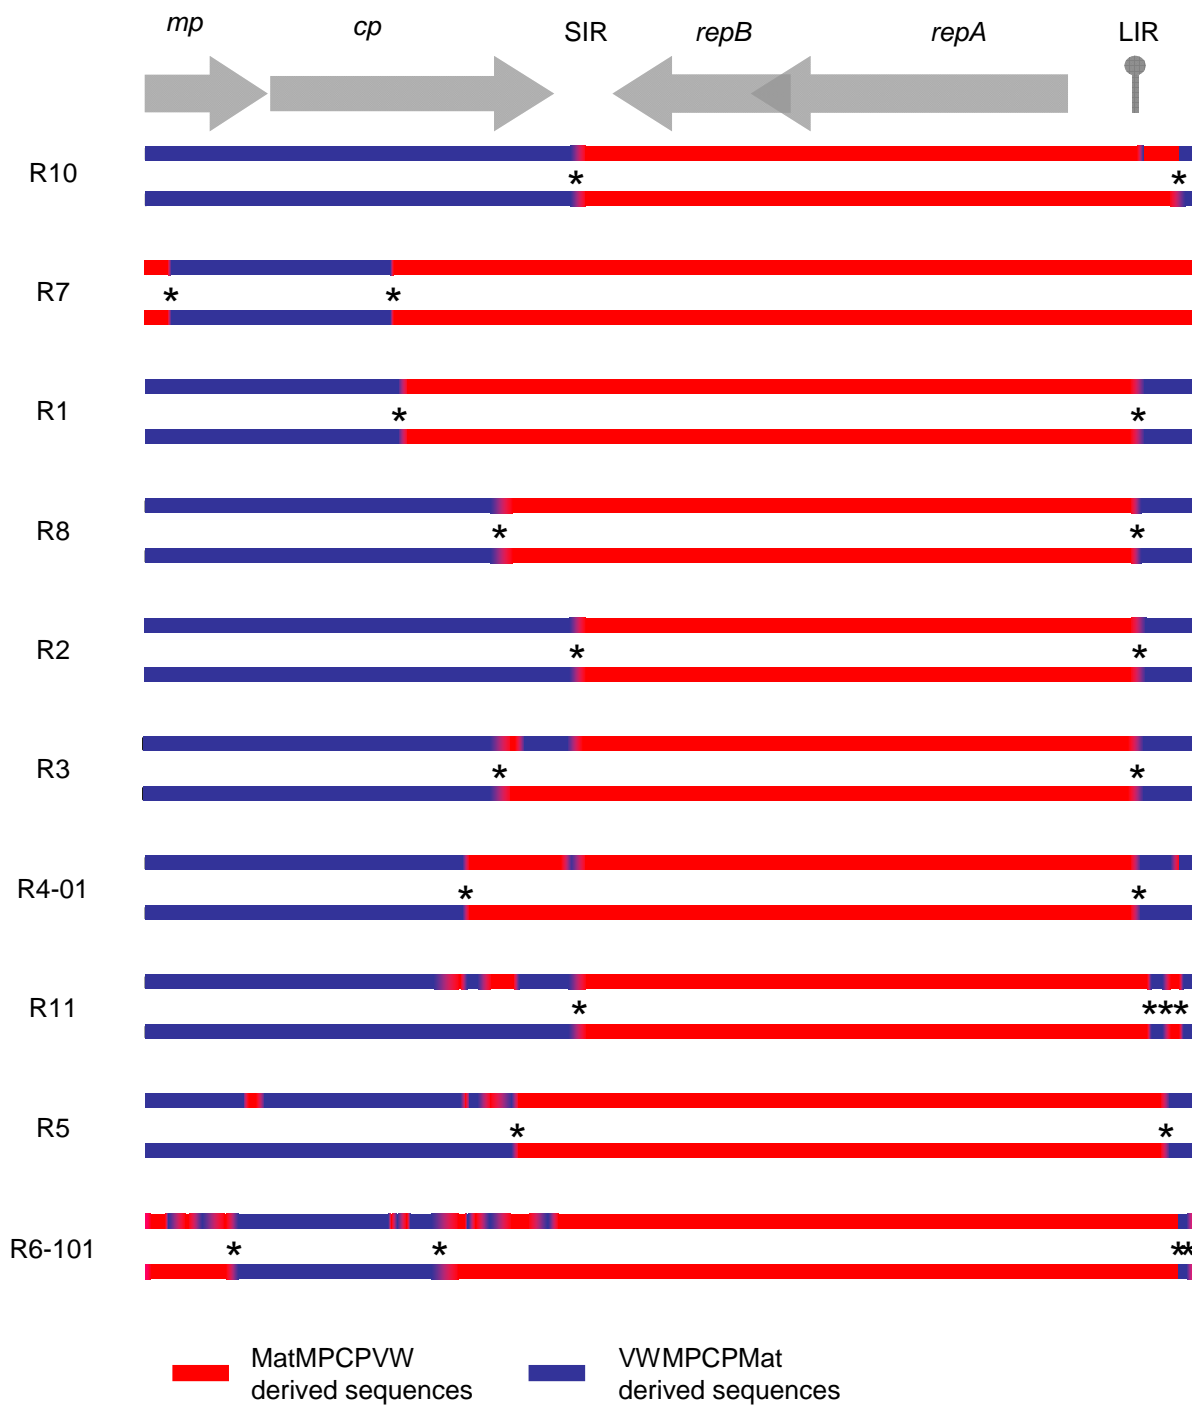

**Supplementary Fig. S1.** Recombination breakpoints detectable by one or more of seven commonly used recombination analysis methods implemented in the program RDP3 (Martin *et al.*, 2005). Genome regions (above) are labelled as described in Fig. 1 of the main text.

#### Supplementary Reference

Martin, D. P., Williamson, C. & Posada, D. (2005). RDP2: recombination detection and analysis from sequence alignments. *Bioinformatics* **21**, 260–262.

van der Walt, E., Rybicki, E. P., Varsani, A., Polston, J. E., Billharz, R., Donaldson, L., Monjane, A. L. and Martin, D. P. (2009). Rapid host adaptation by extensive recombination. *J Gen Virol* **90**, 734–746.
